# Supplementary material for: High resolution monitoring of marine protists based on an observation strategy integrating automated on board ship filtration and molecular analyses
Source: Copernicus journal article supplement (doi:10.5194/os-2016-23), 2016-05-23
Supplement: Supplementary file [file os-2016-23-AC1-supplement.pdf]

# High resolution monitoring of marine protists based on an observation strategy integrating automated on board ship filtration and molecular analyses

Katja Metfies<sup>1</sup>, Friedhelm Schroeder<sup>2</sup>, Johanna Hessel<sup>1</sup>, Jochen Wollschläger<sup>2</sup>, Sebastian Micheller<sup>1</sup>, Christian Wolf<sup>1</sup>, Estelle Kiliass<sup>1</sup>, Pim Sprong<sup>1</sup>, Stefan Neuhaus<sup>3</sup>; Stephan Frickenhaus<sup>3</sup> Wilhelm Petersen<sup>2</sup>

<sup>1</sup>Helmholtz Young Investigators Group PLANKTOSENS, Alfred Wegener Institute Helmholtz Centre for Polar and Marine Research, Bremerhaven, D-27570, Bremerhaven, Germany

<sup>2</sup>*In-situ* Measuring Systems, Helmholtz Zentrum Geesthacht Centre for Materials and Coastal Research, Geesthacht, D-21502, Germany

<sup>3</sup>Scientific Computing, Alfred Wegener Institute Helmholtz Centre for Polar and Marine Research, Bremerhaven, D-27570, Bremerhaven, Germany

*Correspondence to:* Katja Metfies (Katja.Metfies@awi.de)

## 23 Abstract

24 Information on recent ~~photosynthetic~~-biomass distribution and biogeography of photosynthetic marine protists  
25 with adequate temporal and spatial resolution is urgently needed to better understand consequences of  
26 environmental change for marine ecosystems. Here we introduce and review a molecular-based observation  
27 strategy for high resolution assessment of ~~marine these~~ protists in space and time. ~~The observation strategy~~It is  
28 the result of extensive technology developments, adaptations and evaluations which are documented in a number  
29 of different publications and the results of recently accomplished field testing, which are introduced in this  
30 review. The observation strategy is organized ~~in-at~~four different levels. At level 1, samples are collected ~~in-at~~  
31 high spatio-temporal resolution using the remote-controlled automated filtration system AUTOFIM. Resulting  
32 samples can either be preserved for later laboratory analyses, or directly subjected to molecular surveillance of  
33 key species aboard the ship via an automated biosensor system or quantitative polymerase chain reaction (level  
34 2). Preserved samples are analyzed at the next observational levels in the laboratory (level 3 and 4). This  
35 involves at level 3 molecular fingerprinting methods for a quick and reliable overview of differences in protist  
36 community composition. Finally, selected samples can be ~~usedsubjected~~to generate a detailed analysis of  
37 taxonomic protist composition via the latest Next Generation Sequencing Technology (NGS) at level 4. An  
38 overall integrated dataset of the results based on the different analyses provides comprehensive information on  
39 the diversity and biogeography of protists, including all related size classes. At the same time the cost effort of  
40 the observation is optimized in respect to analysis effort and time.

## 43 Keywords

44 Molecular observation strategy, Marine protists, Next Generation Sequencing, Automated Sampling, Molecular  
45 fingerprinting, Quantitative PCR

55

## 56 1 Introduction

57 It is expected that marine ecosystems will be affected by climate change in multiple ways, including rising  
58 atmospheric CO<sub>2</sub> levels, shifts in temperature, circulation, stratification, nutrient input, oxygen content, and  
59 ocean acidification. In summary, these changes will strongly impact marine biota and ecosystems with  
60 consequences for abundance, diversity, spatial distribution, biogeography, or dominance of marine species  
61 (Doney et al., 2012). Marine plankton, comprising prokaryotic and eukaryotic microbes (bacteria and protists) as  
62 well as small or juvenile metazoans, is of utmost importance for the functioning of marine ecosystems. It is  
63 traditionally divided by its size into three classes: The microplankton ( $>20\text{--}200\text{ }\mu\text{m}$ ), the nanoplankton ( $20\text{--}2$   
64  $\mu\text{m}$ ), and the picoplankton ( $<2\text{ }\mu\text{m}$ ). Within these groups of organisms, phytoplankton as the photosynthetic  
65 active part of the plankton accounts for roughly half of global net primary productivity (NPP) (Field et al., 1998)  
66 and is fundamental for any marine ecosystem function or service. As a consequence, changes in phytoplankton  
67 community structures and biogeography as a response to climate change are currently ~~topical issues driving~~  
68 ~~topics~~ in marine ecology. Moreover, marine phytoplankton is very well suited to serve as an indicator of climate  
69 change (Nehring, 1998), because its dynamics are closely coupled to environmental conditions (Acevedo-Trejos  
70 et al., 2014). Despite the necessity and advantage of using marine phytoplankton to assess consequences of  
71 climate change, the task is also challenging in various ways. Marine phytoplankton distribution displays high  
72 spatial heterogeneity or “patchiness” (Mackas et al., 1985) and a pronounced seasonality as a consequence of  
73 physical and chemical oceanographic processes (Boersma et al., 2016; Bresnan et al., 2015). Furthermore, there  
74 are difficulties with the taxonomic surveillance of species in the pico-, or nano-fraction, related to their cell size  
75 and insufficient morphological features (e.g. Caron et al., 1999). As a consequence it is very challenging to  
76 provide information on composition, occurrence, and dynamics of phytoplankton with adequate spatial and  
77 temporal resolution. Together with the difficulties to financially support and maintain long time series these  
78 challenges might account for the relatively small number of marine phytoplankton long-term time series  
79 worldwide. Among them, one long lasting time series, the Helgoland Roads Time Series, is maintained by the  
80 Alfred Wegener Institute Helmholtz Centre for Polar- and Marine Research at the island Helgoland in the  
81 German Bight (North Sea). The dataset comprises information on abundance of phytoplankton on a daily basis  
82 since 1962 (Kraberg et al., 2015; Wiltshire et al., 2009). However, it does not provide information on the  
83 abundance of the smallest phytoplankton species and is restricted to one sampling point. The latter restriction is  
84 overcome by a second major long term marine observation programme that is operated by the Sir Alistair Hardy  
85 Foundation for Ocean Science in Plymouth, UK: the Continuous Plankton Recorder (CPR) Survey’s marine  
86 observation programme (McQuatters-Gollop et al., 2015). Together with its sister surveys it provides large-scale  
87 information on marine plankton distribution, mainly in the North Atlantic and the North Sea since the first  
88 surveys in 1931. Unfortunately, the CPR-approach is restricted to zooplankton and ~~larger bigger~~ phytoplankton  
89 e.g. diatoms. Again, the ecological relevant ~~picophytoplankton of the pico- and nanoplankton~~ fraction is omitted.  
90 However, the smaller phytoplankton is to a certain degree included in the surveys of the FerryBox project  
91 implemented by the Helmholtz Centre Geesthacht in the North Sea. A FerryBox is an autonomous device located  
92 on ships of opportunity that has the capability to autonomously generate information on the plankton  
93 composition and a number of other parameters for the North Sea (Petersen, 2014). Here, phytoplankton is

characterized on the basis of the pigment composition present, which is estimated via multi-channel fluorescence measurements. All phytoplankton groups and size fractions are included in this analysis, but this approach is only suited for the identification of larger taxonomic algal groups. Furthermore, spectrally similar groups (e.g. diatoms and dinoflagellates) cannot be distinguished by this method. Thus the FerryBox project lacks information on species composition of phytoplankton.

Overall, these long term monitoring programmes and other current marine plankton observation approaches have already given important information and indication on climate related change in the marine plankton community. Nevertheless, each of them is limited in one or the other way: (i) the ongoing long time series are mainly limited to one or small numbers of sampling points; (ii) they do not provide a holistic view of changes at the base of marine food webs, because they neglect the pico- and ~~most of the nano~~phytoplankton-fractions; (iii) broad taxonomic knowledge is required for the identification of taxa at species level; (iv) fluorescent characterization of phytoplankton is restricted to the identification of larger taxonomic groups; (v) they are costly if larger numbers of samples need to be processed.

~~To address these~~ ~~in respect to these~~ shortcomings and challenges of current observation approaches, it is of utmost importance to develop efficient automated high throughput approaches and observation strategies that allow reliable surveillance of all phytoplankton size classes with adequate spatio-temporal resolution. Over the past decade numerous publications demonstrated the power of ~~a large variety of~~ molecular methods for ~~the~~ observation of marine plankton organisms, especially of those that are missing distinct morphological features (Metfies et al., 2010; Wolf et al., 2014a; Wollschlaeger et al., 2014). Previous publications have shown the power of the analysis of ribosomal genes (rRNA-genes) to gain new insights into the phylogeny and biogeography of prokaryotic and eukaryotic micro-organisms (Comeau et al., 2011; Sunagawa et al., 2015). The genes coding for the rRNA are particularly well suited for phylogenetic analysis and taxonomical identification, because they are universally present in all cellular organisms. Furthermore, rRNA genes are of relatively large size and contain both highly conserved and variable regions with no evidence for lateral gene transfer (Woese, 1987). The continually growing number of available algal 18S rDNA-sequences, e.g. in the Ribosomal Database Project (Quast et al., 2013), and phylogenetic analysis makes it possible to design hierarchical sets of probes that specifically target the 18S-rDNA of different taxa (Metfies and Medlin, 2007; Thiele et al., 2014). The probes can be used in combination with a wide variety of hybridization based methods, such as RNA-based nucleic acid biosensors (Diercks et al., 2008a; Ussler et al., 2013) quantitative PCR (Bowers et al., 2010; Toebe et al., 2013) or fluorescence *in situ* hybridization (FISH) (Thiele et al., 2014) ~~to identify marine microbes~~. Other methods, such as molecular fingerprinting approaches and Next Generation Sequencing provide information on variability and composition of whole microbial communities. The molecular fingerprinting method Automated Ribosomal Intergenic Spacer Analysis (ARISA) is a quick, cost-effective and meaningful method to determine overall variability in phytoplankton community composition (Kilias et al., 2015) that is independent of the size or morphology of target organisms. In contrast, ~~Next Generation Sequencing (NGS)~~ of ribosomal genes allows high resolution, taxon-specific assessments of protist communities, including their smallest size fractions and the rare biosphere (de Vargas et al., 2015; Kilias, 2014).

Here, we introduce a combined molecular-based observation strategy that allows observation of current phytoplankton composition, distribution, and dynamics at adequate spatial and temporal scales. The resulting data sets can be used to estimate possible alterations related to climate or environmental change. Our strategy is the result of technical developments and the integration of latest sampling- and molecular tools in an advanced

molecular-based observation approach that will optimize marine microbial observation in general, while phytoplankton was in the focus of our developments. In the future our molecular observation strategy is intended to cut down surveillance costs and provide information on marine microbial biodiversity with unprecedented resolution. It is a development of the Helmholtz Young Investigators Group PLANKTOSENS (Assessing Climate Related Variability and Change of Planktonic Foodwebs in Polar Regions and the North Sea) carried out within the framework of COSYNA (Coastal Observing System for Northern and Arctic Seas). Here, we review major published results that lead to the development of the molecular observation strategy and demonstrate the applicability of newly developed sampling technology within the observation strategy. Special emphasis was put on observation of Arctic pico-phytoplankton that constitutes a major contribution to pelagic Chl *a* biomass during summer (Metfies et al., 2016).

## 2 Material and Methods

### 2.1 Sampling

Water samples analyzed in this study were collected during expeditions PS85 (June 2014) and PS96 (May/June 2015) of RV Polarstern to the Arctic Ocean. Samples from deeper water layers containing the deep chlorophyll maximum (DCM) were taken with a rosette sampler equipped with 24 Niskin bottles (12 L per bottle) and sensors for Chl *a* fluorescence, temperature and salinity (CTD). Samples collected via CTD were taken during the up-casts at the vertical maximum of Chl *a* fluorescence determined during the down-casts. The sampling depths varied between 10–50 m. Two litres of water subsamples were taken in PVC bottles from the Niskins. Particulate organic matter for molecular analyses was collected by sequential filtration of one water sample through three different mesh sizes (10 µm, 3 µm, 0.4 µm) on 45 mm diameter Isopore Membrane Filters at 200 mbar using a Millipore Sterifil filtration system (Millipore, USA). Subsequent to sampling the filters were stored at -20°C until further analyses.

Additional samples were collected from a depth of ~ 10 m with the Automated filtration device for marine microorganisms (AUTOFIM), which is coupled to the ship's pump system. Fitting and programming of the device does not require special expertise if it is done according to the manufacturer's protocol. All steps related to the filtration process, including application of Lysis Buffer RLT (Qiagen, Germany), were carried out automatically by AUTOFIM. Herein this study, two litres of sea water were collected and filtrated on a filter with 0.4 µm pore size at 200 mbar. Subsequent to filtration, particulate organic matter on the filter was re-suspended with 600 µl Lysis Buffer RLT (Qiagen, Germany) and stored at -80°C until further processing in the laboratory. The filtration device was cleaned after each filtration step by rinsing the device with fresh-water.

### 2.2 Environmental parameters

Standard oceanographic parameters (salinity, temperature, Chl *a* fluorescence, turbidity, chromophoric dissolved organic matter, dissolved oxygen, pH, nutrients) were measured at the sampling sites by the FerryBox-System (Petersen, 2014) deployed on board RV Polarstern. The measurement interval was 1 min, and the water intake of the system was identical to the water supply of AUTOFIM. To prevent biofouling of the sensors, the FerryBox performed a cleaning cycle including an acid wash and freshwater rinsing once per day.

### 2.3 DNA isolation

**Formatiert:** Schriftart: 10 Pt., Nicht Kursiv

172 Isolation of genomic DNA from the field samples was carried out using the E.Z.N.A™ SP Plant DNA Kit Dry  
173 Specimen Protocol (Omega Bio-Tek, USA) following the manufacturer's protocol. The resulting DNA-extracts  
174 were stored at -20 °C.

175

176

## 177 2.4 DNA quality

178 The integrity of the genomic DNA isolated from water samples collected with AUTOFIM was assessed using  
179 the Agilent DNA 7500 kit (Agilent Technologies, USA) according to the manufacturer's protocol. A volume of  
180 1 µl DNA was applied to the flow cell.

## 181 2.5 ARISA

182 PCR-amplification and subsequent determination of the size of the PCR fragments, and statistical analyses  
183 related to ARISA were accomplished as described previously in the studies contributing to the development of  
184 the molecular observation strategy (e.g. Kiliyas et al., 2015). This included the determination of variability in the  
185 length of the ~~intergenic spacer region~~ internal transcribed spacer 1 (ITS1) amplified via a specific primer set  
186 from genomic DNA extracted from field samples.

## 187 2.6 454-Pyrosequencing

188 Sequencing of protist communities via 454-pyrosequencing was based in all studies reviewed in this manuscript  
189 on amplification of a ~ 670 bp fragment of the 18S rDNA containing the hypervariable V4 region. Sequence  
190 library preparation and data analysis was described previously in the studies contributing to the development of  
191 the molecular observation strategy (e.g. Kiliyas et al., 2013; Metfies et al., 2016). Thus, for more detailed  
192 information, the reader is referred to these publications-

## 193 2.7 Quantitative PCR-assay

194 The quantitative PCR was carried out in a nested two-step approach. We used this nested approach, because it  
195 minimized the variability between technical replicates of q-PCR data obtained from analyses of field samples.  
196 The applicability of the nested approach was evaluated by a comparison of q-PCR data with manual counts of  
197 *Phaeocystis pouchetii* in field samples (data not shown). In the first step total eukaryotic 18S rDNA was  
198 amplified from a positive control ( genomic DNA *Phaeocystis pouchetii*), a negative control (no template) and  
199 genomic DNA isolated from field samples using the universal primer-set 1F-(5'-AAC TGG TTG ATC CTG  
200 CCA GT-3') / 1528R- (5'-TGA TCC TTC TGC AGG TTC ACC TAC-3') (modified after Medlin et al., 1988).  
201 PCR-amplifications were performed in a 20 µl volume in a thermal cycler (Eppendorf, Germany) using 1x  
202 HotMasterTaq buffer containing Mg<sup>2+</sup>, 2.5 mM (5'Prime); 0.5 U HotMaster Taq polymerase (5'Prime,  
203 Germany); 0.4 mg/ml BSA; 0.8 mM (each) dNTP (Eppendorf, Germany); 0.2 µM of each primer (10 pmol/µl)  
204 and 1 µl of template DNA (20 ng/µl). The amplification was based on 35 cycles, consisting of 94°C for 1 min,  
205 54°C for 2 min and 72°C for 2 min, followed by 1 min denaturation at 94°C and finalized by a final extension of

Formatiert: Schriftart: Kursiv

10 min at 72°C. Subsequently PCR products were purified using the QIAquick PCR purification kit (Qiagen, Hilden, Germany). In the second step a qPCR-assay was carried out using a species specific primer-set 82F-(5'-GTG AAA CTG CGA ATG GCT CAT-3') / P1np- (5'-CGG GCG GAC CCG AGA TGG TT-3') for *Phaeocystis pouchetii*. The quantitative PCR-assays were performed in triplicate in a 20 µl volume in a 7500 Fast Real-Time PCR-System (Life Technologies Corporation; Applied Biosystems, USA) using 1x SYBR Select Mastermix (Life Technologies, USA); 0.2 µM of each primer (10 pmol/µl) and 2µl of the purified 18S rDNA PCR-fragment. The amplification was based on 40 cycles, consisting of 95°C for 10 min, 95°C for 15 sec, 66°C for 1 min. The quantitative PCR-assay was calibrated with a dilution series of a laboratory culture of *Phaeocystis pouchetii* (Figure 4). Based on this calibration CT-values were transformed into cell numbers using the following equation:

$$CT = -2.123 \ln(\text{cell numbers}) + 38.788.$$

### 3 Results and Discussion:

#### 3.1 Overview Molecular Based Observation Strategy

The molecular based observation strategy that we present here is organized in 4 different levels (Figure 1). At level 1, samples are collected in high spatio-temporal resolution using the remote-controlled automated filtration system AUTOFIM (Figure 2). The sampling system can either be deployed on a fixed monitoring platform or aboard a ship (research vessel or ship of opportunity) without the need of highly trained personal. Samples can be preserved with a preservation buffer (e.g. DNaGard, Biomatrix, USA) for later laboratory analyses, or directly subjected to molecular surveillance of key species aboard the ship via an automated biosensor system or quantitative polymerase chain reaction (level 2). Direct analyses aboard ships provide near real time information on abundance and distribution of phytoplankton key species that can be used to optimize phytoplankton sampling for detailed high resolution analyses of overall phytoplankton composition during an ongoing sampling campaign. The resulting preserved samples will be analyzed at the next observational levels in the laboratory (level 3 and 4). This involves at level 3 molecular fingerprinting methods that provide a quick and reliable overview of differences in protist community composition of the samples in a given observation area or time period. Furthermore, this information can be used to select representative samples for detailed analysis of taxonomic protist composition via latest next generation sequencing at level 4. An overall integrated dataset of the results based on the different analyses provides comprehensive information on the diversity and biogeography of protists, including all related size classes. At the same time, the cost effort of the observation is optimized in respect to analysis effort and time. Sampling based on the autonomous filtration device is more cost efficient, because labor costs and the requirement of ship space and time are reduced.

The development of the Molecular Observation Strategy was based on extensive method development and evaluation. Overall, it included: (i) the development of an automated remote controlled filtration system (Figure 2, (ii) the evaluation and application of Automated Ribosomal Intergenic Spacer Analysis (ARISA) (Kilias et al., 2015), (iii) the implementation of Next Generation Sequencing (454-pyrosequencing; Illumina) for

Formatiert: Schriftart: Nicht Kursiv

244 marine protists (e.g. Wolf et al., 2013) and (iv) the development and evaluation of molecular probe based  
245 methods such as molecular sensors (Wollschlaeger et al., 2014) or quantitative PCR (qPCR). Most of the field  
246 work presented here in this publication was accomplished in the Arctic Ocean with special emphasis on the area  
247 of the “Deep-Sea Long-Term Observatory Hausgarten” established by the Alfred Wegener Institute for Polar-  
248 and Marine Research in 1999 to carry out regular observations of the ecosystem in the eastern Fram Strait  
249 (Soltwedel, 2005). In the following, the different parts of the observation strategy are presented in detail.

Kommentar [WJ1]: Auch hier mit “ä”?

### 250 3.1.1 Automated remote controlled filtration system

251 The remote controlled automated filtration system for marine microbes (AUTOFIM) is the core of the  
252 observation strategy. The filtration system (Figure 2) can be operated autonomously aboard research vessels or  
253 ships of opportunity. AUTOFIM allows filtration of a sampling volume up to five litres from the upper water  
254 column. In total, 12 filters can be taken and stored in a sealed sample archive. Prior to storage, a preservative  
255 such as Lysis Buffer RLT (Qiagen, Germany) is applied to the filters preventing degradation of the sample  
256 material, that can be used for molecular or biochemical analyses. Exchanging the sample archive is a quick and  
257 easy task, which makes it feasible for lay persons from the ships’ staff to take care of the automated filtration.  
258 This would circumvent the need to provide support of an additional specifically trained personal for filtration in  
259 the field. Filtration can be triggered after defined regular time intervals or remote controlled from a scientist at  
260 the research institute. Additionally, it could also be event-triggered if the filtration system would be operated in  
261 connection with *in situ* sensor systems (Petersen, 2014). Overall, AUTOFIM provides the technical background  
262 for automated high spatio-temporal resolution collection of marine particles e.g. for molecular analyses. During  
263 expedition PS92 of RV Polarstern to the Arctic Ocean in summer 2015, AUTOFIM was used for the first time to  
264 collect samples from the upper water column at a depth of ~ 10 m, which is the depth of the inlet of the ships  
265 water pump system. Subsequent to filtration, samples were preserved with a preservation buffer and stored at -  
266 80°C until further analyses in the laboratory.

### 267 3.1.2 Automated Ribosomal Intergenic Spacer Analysis (ARISA)

268 ARISA provides information on variability in protist community structure in larger sample sets at reasonable  
269 costs and effort. In an ARISA-analysis the community is characterized by its community profile, which is based  
270 on the composition (presence/absence) of differently sized DNA fragments. The DNA fragments are a result of  
271 the amplification of the internal transcribed spacer region of the ribosomal operon, which displays a high degree  
272 of taxon-related variability in its length.~~ARISA provides information on variability in protist community~~  
273 ~~structure in larger sample sets at reasonable costs and effort, while~~ ARISA-profiles reflect taxon specific  
274 differences observed in NGS-data sets (Kiliyas et al., 2015). In the developmental phase of the molecular  
275 observation strategy, this method was used in a number of different studies to better understand variability of  
276 Arctic marine protist communities in relation to environmental conditions and ocean currents. Based on ARISA  
277 analyses we identified large scale patterns of protist biogeography that were tightly connected to ambient water  
278 masses, ocean currents and sea ice coverage (Kiliyas et al., 2014a; Metfies et al., 2016; Wolf et al., 2014b). We  
279 suggest ~~to use using~~ ARISA as part of the molecular observation strategy to identify biogeographic or  
280 biodiversity patterns ~~at meso- or large-~~ in large sample sets, e.g. collected via AUTOFIM. Identification of  
281 pattern in phytoplankton biogeography or biodiversity requires analyses of large samples sets, because However,

Formatiert: Englisch (USA)



spatial heterogeneity of marine phytoplankton is ~~large~~considerable, while the vertical dimension is ~~of from~~ particular importance, since differences in vertical abundance and composition of phytoplankton impact primary production, export processes and energy transfer to higher trophic levels (Leibold, 1990). Vertical distribution of marine protists is determined by opposing resource gradients and mixing conditions (Mellard et al., 2011). In respect to this it was necessary to evaluate how representative samples from 10 m depth might be for the ~~photic zone in the~~ underlying water column. This would be important in case AUTOFIM would be applied to study large scale biogeographic patterns of marine protists. Acknowledging the potential of ARISA to quickly generate meaningful information on variability between protist samples, we used this methodology to assess the similarity of phytoplankton community composition in samples from the upper water column collected with AUTOFIM and in samples collected in deeper water layers via CTD ~~at the same location~~. The ARISA patterns obtained from deeper ~~water layers (20m; 50m) horizons~~ are highly similar to those obtained from the samples collected with AUTOFIM. The samples collected with AUTOFIM at stations PS92/19 and PS92/43 clustered together with the individual samples collected at ~~other depths at the same location deeper horizons~~ (5m; 20m; 50m) and ~~with the integrated signal from the CTD sampling all three depths at this location the same station~~ (Figure 3). This result suggests that qualitative information on phytoplankton community composition based on sampling with AUTOFIM ~~might be can be considered as being~~ representative for the photic layer of the water column. This might be attributed to the observation that geography and ambient water masses have a major impact on qualitative composition of marine plankton communities on a larger scale, with plankton communities being partially structured according to ~~the~~ basin of origin (de Vargas et al., 2015; Metfies et al., 2016).

### 3.1.3 Next Generation Sequencing (454-pyrosequencing; Illumina)

Sequencing of ribosomal genes is a valuable approach to describe the taxonomic composition of protist communities including the small size fractions. Technical progress in this field has been tremendously rapid over the last 5-10 years. Around ten to fifteen years ago, sequencing of 18S rDNA clone libraries was the gold standard to assess marine eukaryotic and prokaryotic communities (Hugenholtz, 2002). Around six years ago, first studies reported the use of 454 pyrosequencing for assessment of prokaryotic diversity (Turnbaugh et al., 2009). The massively parallel 454-pyrosequencing ~~was found to generated~~ several hundred thousands of ribosomal sequence per sample and had the potential to uncover more organisms, even rare species from large scale biodiversity surveys (Sunagawa et al., 2015). We assessed the validity of 454 pyrosequencing by evaluating the sequence data sets with results obtained via other methods, such as 18S clone libraries, HPLC and microscopic counts. ~~The samples analyzed in the course of this evaluation originated from the same Niskin-bottle of a respective CTD-cast~~. In our data sets pyrosequencing data were in good agreement with information on community composition generated by high pressure liquid chromatography (HPLC) or clone libraries (Kilias et al., 2013; Wolf et al., 2013). During the past six years, we used 454-pyrosequencing to determine ~~the~~ variability of protist community structure in Fram Strait, in the area of the “Deep-Sea Long-Term Observatory Hausgarten”, and the central Arctic Ocean (Kilias et al., 2014a; Metfies et al., 2016). Overall, our data revealed that *Phaeocystis pouchetii* is an important contributor to Arctic protist communities, particularly to the pico-eukaryote community composition. In 2009 the species constituted up to 29.6% of the sequence assemblage retrieved from pico-eukaryote samples ~~in that area collected in the area of the “Deep-Sea Long-Term Observatory Hausgarten”~~ (Kilias et al., 2014b). A larger survey of Arctic protist community composition in 2012

321 including Fram Strait and larger parts of the Central Arctic Ocean confirmed these observations and identified  
322 *Phaeocystis pouchetii* again as an important contributor to Arctic pico-eukaryote Chl *a* biomass, ~~which~~ The latter  
323 constituted between 60-90% of Chl *a* biomass during summer 2012 in the Arctic Ocean (Metfies et al., 2016).  
324 This comprehensive sequence based information on phytoplankton community composition was very well suited  
325 to serve as a basis for the development of molecular probes that can be used for molecular surveillance with  
326 molecular sensors or quantitative PCR (qPCR).

#### 327 328 3.1.4 Development and evaluation of molecular probe based methods: ~~such as~~ molecular sensors or qPCR

329 Molecular Sensors are ~~chip-chip~~-based formats that allow parallel identification and quantification of multiple  
330 taxa in a single experiment. The identification is based on solid phase hybridization of molecular probes,  
331 immobilized to the surface of the sensor chips that bind to the rRNA or rDNA of the target species (Diercks et  
332 al., 2008a; Diercks et al., 2008b; Ussler et al., 2013). ~~Quantitative or real time PCR (qPCR) is a standard PCR~~  
333 ~~with the advantage of detecting the amount of DNA formed after each cycle with either fluorescent dyes or~~  
334 ~~fluorescently tagged oligonucleotide probes. Quantitative or real time PCR (qPCR) is a PCR-based method that~~  
335 ~~utilizes fluorescent dyes or fluorescently-labelled molecular probes to quantify nucleic acid after each PCR cycle.~~  
336 Quantitative PCR is a useful tool for quantitation of nucleic acids, respectively species in a given environment  
337 (Toebe et al., 2013). An automated molecular sensor (Diercks et al., 2008a) and qPCR are intended to be part of  
338 the molecular observation strategy in order to generate near real time information on the occurrence of key  
339 species on board ship and to complement NGS-based information on phytoplankton community composition  
340 with quantitative information on the occurrence of selected key species (Figure 1). These approaches are  
341 necessary because of biases related to the amplification of the 18S rDNA gene via PCR, and uncertainties in  
342 respect to copy number of the gene in the genome of different species (e.g. Zhu et al., 2005), which make it  
343 difficult to deduce species abundance based on NGS. ~~With respect to this, we~~ developed new molecular probes  
344 for relevant taxa that were major contributors in our NGS-libraries or that were known from published literature  
345 to occur in the observation areas (North Sea and Arctic Ocean). The molecular probes were either used in  
346 combination with molecular sensors (Wollschlaeger et al., 2015), qPCR or fluorescent *in situ* hybridization  
347 (FISH) (Thiele et al., 2014). The ~~data on species abundance obtained from results~~ of molecular sensors targeting  
348 either 18S rDNA or 18S rRNA were evaluated with the results obtained from microscopic ~~counts, HPLC and~~  
349 ~~flow cytometry~~ (Wollschlaeger et al., 2014). The molecular sensor targeting 18S rRNA shows a robust linear  
350 relationship between molecular sensing signal and cell counts via microscopy. The positive evaluation results for  
351 the rRNA based nucleic acid biosensor suggest an excellent high potential of the method to be used as module in  
352 a Molecular Observation Strategy. Here, the ~~related~~-regular quantitative molecular monitoring would benefit  
353 from advantages like reduced effort (time, costs and labor), and the high potential for automation of the  
354 methodology (Wollschlaeger et al., 2014). In the current study we demonstrate the potential of quantitative PCR  
355 to better understand the biogeography and abundance of *Phaeocystis pouchetii* in Arctic Waters using a specific  
356 primer set for qPCR. The qPCR values were calibrated against defined numbers of laboratory cultures (Figure 4)  
357 to allow quantification of *Phaeocystis pouchetii* via this method. During expedition PS85 of RV Polarstern in  
358 June 2014, we used qPCR on board ship to determine the abundance of *Phaeocystis pouchetii* on a transect  
359 through Fram Strait at ~79°N (Figure 4). The results of our survey suggest that abundance of *Phaeocystis*  
360 *pouchetii* in Fram Strait is determined by water mass properties such as salinity, ice coverage and water

Kommentar [WJ2]: "ä"?

Kommentar [WJ3]: "ä"?

temperature, ~~while~~ salinity is positively correlated with abundance of *Phaeocystis pouchetii*. The abundance of *Phaeocystis pouchetii* was higher in Atlantic Waters, which are characterized by higher salinities in the range of 33-34 PSU, than in Polar Waters of Fram Strait which are characterized by salinities around 31 PSU. In Atlantic Waters the average cell number of *Phaeocystis pouchetii* was ~ 3.5 times higher than the average cell number in Polar Waters of Fram Strait. Furthermore, Chl *a* biomass appears to be correlated with abundance of *Phaeocystis pouchetii*. Our findings are in agreement with previous studies that reported blooms of *Phaeocystis pouchetii* in waters around Svalbard with cell abundances in a similar range as observed in this study (Wassmann et al., 2005). In 2012, we carried out a large scale study to survey the biogeography of marine protists in the Arctic. This survey included a comprehensive NGS based analysis of community composition along 79°N in Fram Strait in June and later in the season in Nansen Basin and Amundsen Basin. Overall, the findings of 2014, suggesting a positive correlation of Atlantic water properties, e.g. higher salinity and lower ice coverage with high abundance of *Phaeocystis pouchetii* are in agreement with the previous study of 2012. This study also ~~suggested this~~ found a positive correlation in agreement with the findings of 2014, even though sequence abundance of *Phaeocystis pouchetii* was more evenly distributed in Fram Strait in ~~2012 that year~~ (Metfies et al., 2016). This might be attributed to the complex current system in the area. Overall, qPCR carried out on board ship provided a near real time overview of the distribution of a protist key species during expedition PS85.

#### 4 Conclusions

Here we introduce for the first time an integrated hierarchically organized molecular based observation strategy that combines autonomous sampling with molecular analyses. It is as a valuable tool to survey phytoplankton abundance and biodiversity in the desired high spatial and temporal resolution as well as at different levels of taxonomic resolution. The observation strategy is based on a combination of ship based automated filtration, online measurements of oceanographic parameter, and different molecular analyses. On one hand, our approach provides near real time information on phytoplankton key species abundance in relation to environmental conditions already on board ship. On the other hand, it provides detailed information on variability in the total phytoplankton community composition based on comprehensive, laboratory-based molecular analyses such as molecular fingerprinting methods and NGS. This information can be subsequently correlated with information on the physical and chemical marine environment and has ~~strong~~ excellent potential to complement other hierarchically organized observation strategies as described e.g. for the detection of marine hazardous substances and organisms (Zielinski et al., 2009). In summary, our molecular observation strategy is a significant contribution to refine regular assessment of consequences of ongoing environmental change for marine phytoplankton communities with respect to adequate spatial, temporal, and taxonomic resolution.

#### 5 Acknowledgements

This work was supported through the Coastal Observing System for Northern and Arctic Seas (COSYNA), by institutional funds of the Alfred Wegener Institute for Polar- and Marine Research, Bremerhaven, funds of the Helmholtz Zentrum Geesthacht Centre for Materials and Coastal Research, and funds of the Initiative and Networking Fund of the Helmholtz Association for financing the Helmholtz-University Young Investigators Group PLANKTOSENS (VH-NG-500). We thank the crew of R.V. *Polarstern* for excellent support during the work at sea. Furthermore we thank Kerstin Oetjen, Swantje Rogge and Christiane Lorenzen for great technical

assistance. Annegret Müller and Uwe John are acknowledged for excellent technical support of the fragment analysis.

#### Figure Legends:

Fig. 1: A: Overview of the smart observation strategy which is organized in four different levels: --level 1: samples are collected underway or at monitoring sites using the remote-controlled automated filtration system AUTOFIM; level 2: direct molecular surveillance of key species aboard the ship via an automated biosensor system or quantitative polymerase chain reaction; level 3: preserved samples are analyzed via molecular fingerprinting methods (e.g. ARISA) that provide a quick and reliable overview of differences in protist community composition of the samples in a given observation area or time period; level 2: detailed analysis of taxonomic protist composition in selected samples via latest next generation sequencing. B-E: Schematic diagrams illustrating the analyses used in the smart observation strategy.

Fig. 2: A: AUTOFIM installed on board RV Polarstern (1: Sample reservoir; 2: Filtration; 3: Archive for preserved filters. B: Filtration-module (1:Filter stacker; 2:Filtration cap).

Fig. 3: ~~MetaMDS Plot of ARISA fingerprints generated from samples collected via CTD and AUTOFIM. Samples were collected during expeditions PS92 and PS 94 of RV Polarstern to the Arctic Ocean. MetaMDS Plot (non metric multidimensional scaling plot) of ARISA fingerprints generated from samples collected via Niskin bottles coupled to a CTD-rosette and AUTOFIM. The closer the samples are located to each other in the metaMDS-plot, the more similar are the ARISA-profiles of the samples. The label of the samples gives information on the cruise leg (PSXX) and the station (/XX). Samples were collected during expeditions PS92 and PS 94 of RV Polarstern to the Arctic Ocean during summer 2015. The samples collected during PS94 serve as an outgroup in this analysis.~~

Fig. 4: ~~Assessment of *Phaeocystis pouchetii* in Fram Strait. A: Calibration of *Phaeocystis pouchetii*-specific qPCR assay with laboratory cultures. B: Abundance of *Phaeocystis pouchetii* in Fram Strait. C: Principal component analysis including environmental parameter and *Phaeocystis pouchetii*.~~ Assessment of *Phaeocystis pouchetii* in Fram Strait. A: Calibration of *Phaeocystis pouchetii* specific qPCR assay with a dilution series of laboratory cultures. The CT value is significantly correlated with cell numbers. B: Abundance of *Phaeocystis pouchetii* in Fram Strait. The dots and the associated numbers represent sampling sites and associated station numbers of expedition ARKXXVIII(PS85) of RV Polarstern in summer 2014, while cell numbers/liter are reflected by different colours. C: Principal component analysis including environmental parameters (temperature, salinity, Chl *a* biomass and sea ice coverage) and abundance of *Phaeocystis pouchetii*. Triangles and associated numbers represent sampling sites and associated station numbers of expedition ARKXXVIII (PS85) of RV Polarstern in summer 2014. HG4 indicates the central station of the “Deep-Sea Long Term Observatory Hausgarten” in Fram Strait. The Eigenvalues indicate the proportion of variance explained by different dimensions in the diagram. The black bars in the histogram reflect the x-axis and the y-axis. Here ~ 80% of variance is explained in this two-dimensional diagram of the PCA (x-axis: 50.29%; y-axis: 30.08%).

Formatiert: Zeilenabstand: einfach

481  
482  
483  
484  
485  
486  
487  
488  
489  
490  
491  
492  
493  
494  
495  
496  
497  
498  
499

Fig. 1

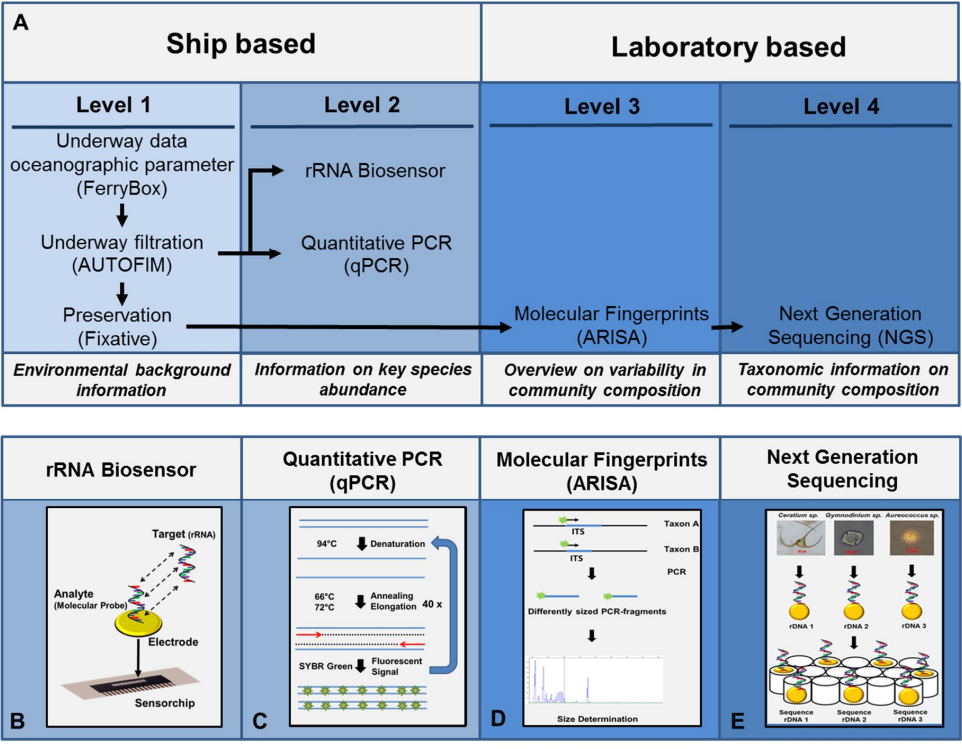

500

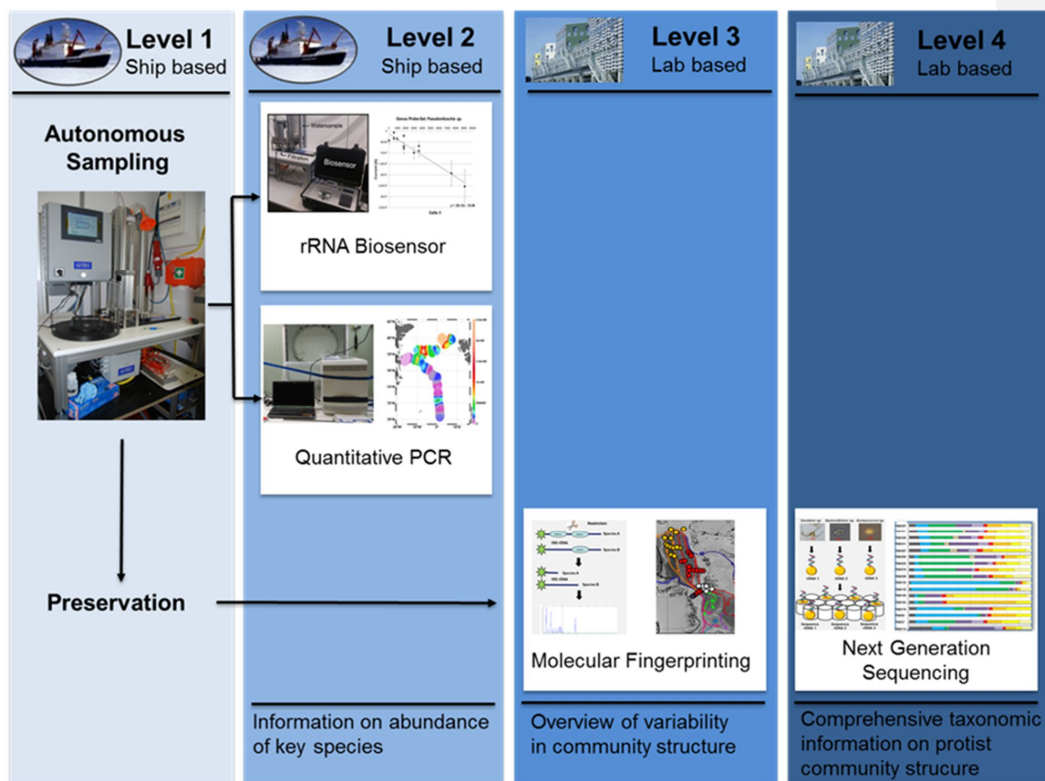

Fig. 1: Overview of the smart observation strategy which is organized in four different levels. Fig. 1: Overview of the smart observation strategy which is organized in four different levels: level 1: samples are collected underway or at monitoring sites using the remote-controlled automated filtration system AUTOFIM; level 2: direct molecular surveillance of key species aboard the ship via an automated biosensor system or quantitative polymerase chain reaction; level 3: preserved samples are analyzed via molecular fingerprinting methods (e.g. ARISA) that provide a quick and reliable overview of differences in protist community composition of the samples in a given observation area or time period; level 2: detailed analysis of taxonomic protist composition in selected samples via latest next generation sequencing. B-E: Schematic diagrams illustrating the analyses used in the smart observation strategy.

522  
523  
524  
525  
526  
527  
528  
529  
530  
531  
532

Figure 2

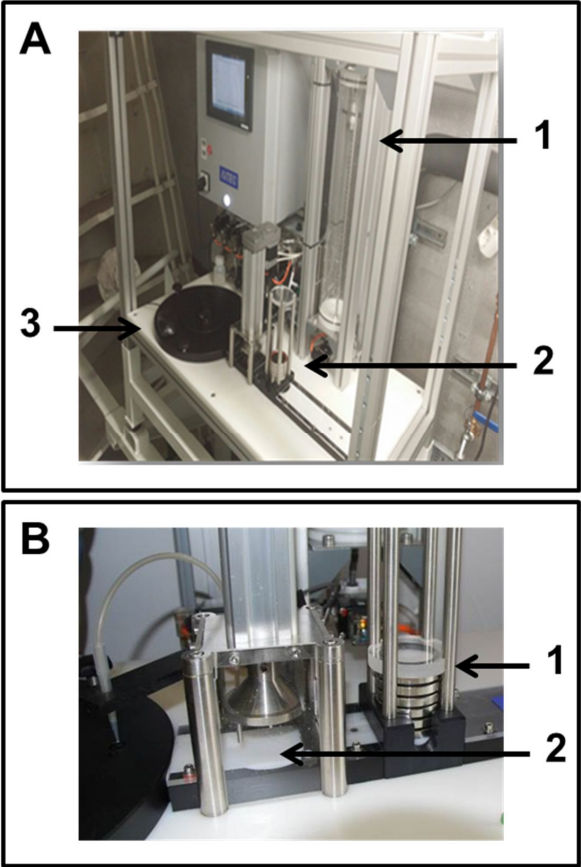

533  
534  
535  
536  
537  
538  
539  
540

Fig. 2: A: AUTOFIM installed on board RV Polarstern (1: Sample reservoir; 2: Filtration-module; 3: Archive for preserved filters. B: Filtration-module (1:Filter stacker; 2:Filtration cap).



Fig. 3

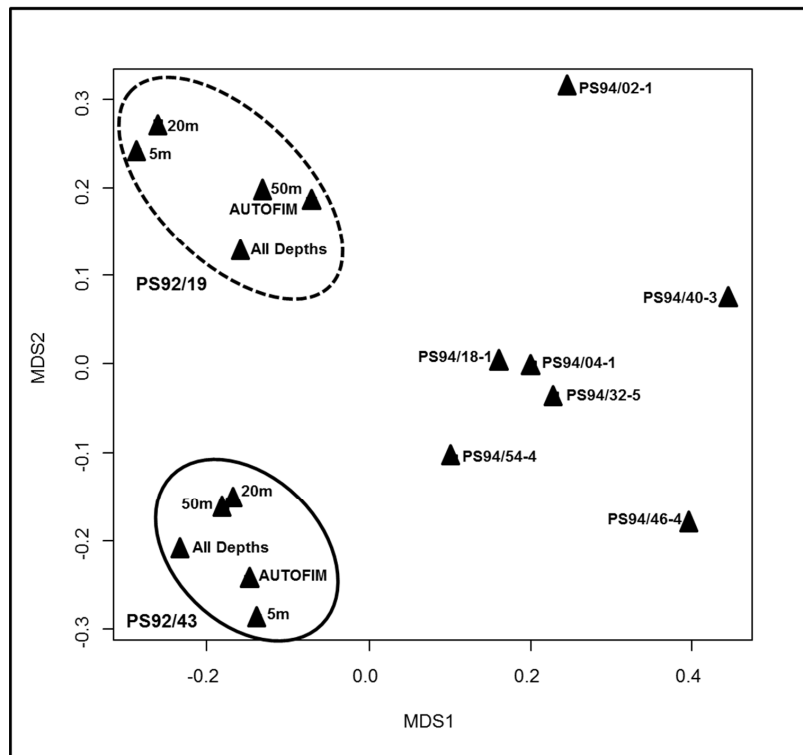

Fig. 3: MetaMDS-Plot (non metric multidimensional scaling plot) of ARISA fingerprints generated from samples collected via CTD and AUTOFIM. The closer the samples are located to each other in the metaMDS-plot, the more similar are the ARISA-profiles of the samples. The label of the samples gives information on the cruise leg (PSXX) and the station (/XX). Samples were collected during expeditions PS92 and PS 94 of RV Polarstern to the Arctic Ocean during summer 2015. The samples collected during PS94 serve as an outgroup in this analysis. -

566  
567  
568  
569  
570  
571  
572  
573  
574  
575  
576  
577  
578  
579  
580

Fig. 4

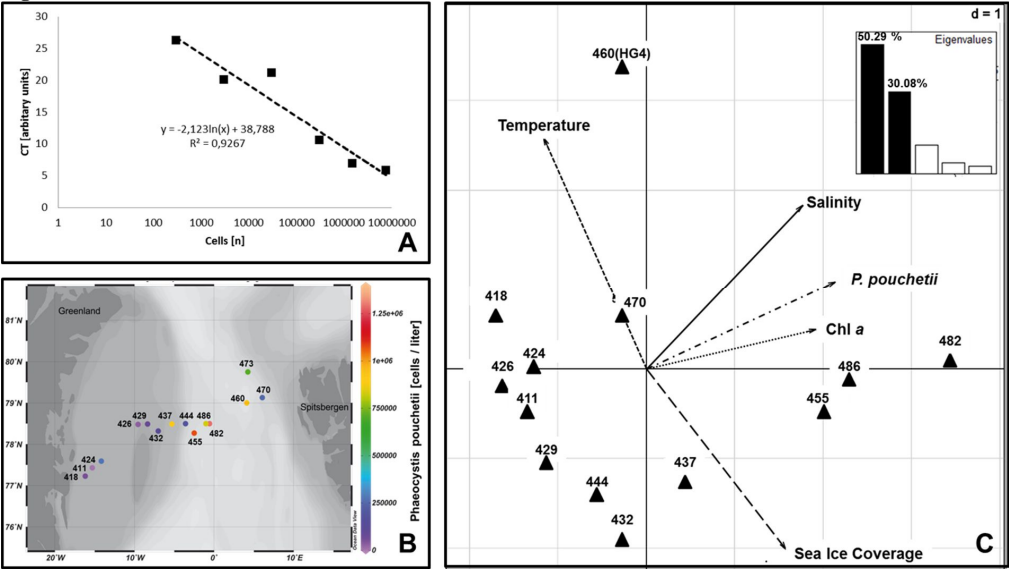

581  
582

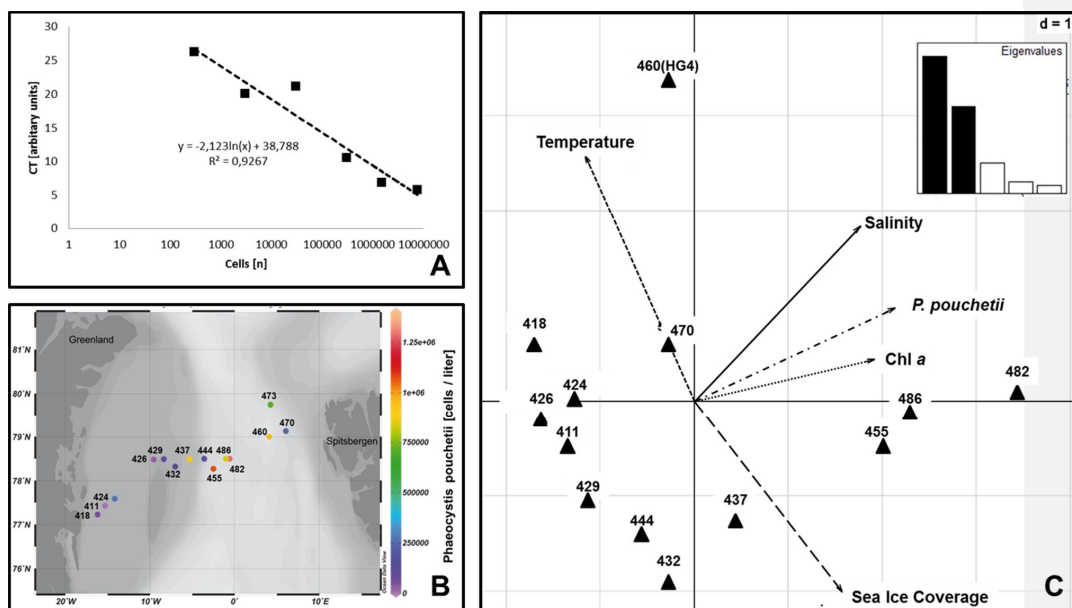

Fig. 4: Assessment of *Phaeocystis pouchetii* in Fram Strait. A: Calibration of *Phaeocystis pouchetii* specific qPCR assay with a dilution series of laboratory cultures. The CT value is significantly correlated with cell numbers. B: Abundance of *Phaeocystis pouchetii* in Fram Strait. The dots and the associated numbers represent sampling sites and associated station numbers of expedition ARKXXVIII(PS85) of RV Polarstern in summer 2014, while cell numbers/liter are reflected by different colours. C: Principal component analysis including environmental parameters (temperature, salinity, Chl *a* biomass and sea ice coverage) and abundance of *Phaeocystis pouchetii*. Triangles and associated numbers represent sampling sites and associated station numbers of expedition ARKXXVIII(PS85) of RV Polarstern in summer 2014. HG4 indicates the central station of the “Deep-Sea Long Term Observatory Hausgarten” in Fram Strait. The Eigenvalues indicate the proportion of variance explained by different dimensions in the diagram. The black bars in the histogram reflect the x-axis and the y-axis. Here ~ 80% of variance is explained in this two-dimensional diagram of the PCA (x-axis: 50.29%; y-axis: 30.08%).

Formatiert: Schriftart: Kursiv

615  
616  
617  
618  
619  
620  
621  
622  
623  
624  
625  
626  
627  
628  
629  
630  
631  
632  
633  
634  
635  
636  
637  
638  
639  
640  
641  
642  
643  
644  
645  
646  
647  
648  
649  
650  
651  
652  
653  
654  
655  
656  
657  
658

**References**

Acevedo-Trejos, E., Brandt, G., Steinacher, M. and Merico, A.: A glimpse into the future composition of marine phytoplankton communities. *Front. Mar. Sci.*, 10.1146/annurev-marine-041911-111611, 2014.

Boersma, M., Gruner, N., Signorelli, N.T., Gonzalez, P.E.M., Peck, M.A. and Wiltshire, K.H.: Projecting effects of climate change on marine systems: is the mean all that matters? *Proc. R. Soc. B-Biol. Sci.*, 2015227410.1098/rspb.2015.2274, 2016.

Bowers, H.A., Brutemark, A., Carvalho, W.F. and Graneli, E.: Combining Flow Cytometry and Real-Time PCR Methodology to demonstrate consumption by *Prymnesium parvum*. *J. Am. Water Resour. Assoc.*, 10.1111/j.1752-1688.2009.00397.x, 2010.

Bresnan, E., Cook, K.B., Hughes, S.L., Hay, S.J., Smith, K., Walsham, P. and Webster, L.: Seasonality of the plankton community at an east and west coast monitoring site in Scottish waters. *Journal of Sea Research*, 10.1016/j.seares.2015.06.009, 2015.

Caron, D. A., Peele, E.R., Lim E.L. and Dennett, M.R.: Picoplankton and nanoplankton and their trophic coupling in the surface waters of the Sargasso Sea south of Bermuda. *Limnol Oceanogr*, 10.4319/lo.1999.44.2.0259, 1999.

Comeau, A.M., Li, W.K.W., Tremblay, J.E., Carmack, E.C. and Lovejoy, C.: Arctic Ocean Microbial Community Structure before and after the 2007 Record Sea Ice Minimum. *Plos One*, 604 10.1038/srep00604, 2011.

de Vargas, C., Audic, S., Henry, N., Decelle, J., Mahe, F., Logares, R., Lara, E., Berney, C., Le Bescot, N., Probert, I., Carmichael, M., Poulain, J., Romac, S., Colin, S., Aury, J.-M., Bittner, L., Chaffron, S., Dunthorn, M., Engelen, S., Flegontova, O., Guidi, L., Horak, A., Jaillon, O., Lima-Mendez, G., Lukes, J., Malviya, S., Morard, R., Mulot, M., Scalco, E., Siano, R., Vincent, F., Zingone, A., Dimier, C., Picheral, M., Searson, S., Kandels-Lewis, S., Acinas, S.G., Bork, P., Bowler, C., Gorsky, G., Grimsley, P., Hingamp, D., Iudicone, F., Not, H., Ogata, S., Pesant, J., Raes, M.E., Sieracki, S., Speich, N., Stemann, L., Sunagawa, S., Weissenbach, J.,

**Formatiert:** Schriftart: Times New Roman, 10 Pt.

**Formatiert:** Schriftart: (Standard) Times New Roman, 10 Pt., Englisch (USA)

**Formatiert:** Zeilenabstand: 1,5 Zeilen

**Formatiert:** Schriftart: (Standard) Times New Roman, 10 Pt.

**Formatiert:** Schriftart: (Standard) Times New Roman, 10 Pt., Englisch (USA)

**Formatiert:** Schriftart: (Standard) Times New Roman, 10 Pt.

**Formatiert:** Schriftart: (Standard) Times New Roman, 10 Pt., Englisch (USA)

**Formatiert:** Schriftart: (Standard) Times New Roman, 10 Pt.

**Formatiert:** Schriftart: (Standard) Times New Roman, 10 Pt., Englisch (USA)

659 Wincker, P. and Karsenti, E.: Eukaryotic plankton diversity in the sunlit ocean. *Science*,  
660 10.1126/science.1261605, 2015.

661 | 

---

662 Diercks, S., Metfies, K. and Medlin, L.K.: Development and adaptation of a multiprobe biosensor for the use in a  
663 semi-automated device for the detection of toxic algae. *Biosens. Bioelectron*, 10.1016/j.bios.2008.01.010, 2008a.  
664

665 Diercks, S., Medlin, L.K. and Metfies, K.: Colorimetric detection of the toxic dinoflagellate *Alexandrium*  
666 *minutum* using sandwich hybridization in a microtiter plate assay. *Harmful Algae*, 10.1016/j.hal.2007.06.005,  
667 2008b.  
668

669 Doney, S.C., Ruckelshaus, M., Duffy, J.E., Barry, J.P., Chan, F., English, C.A., Galindo, H.M., Grebmeier, J.M.,  
670 Hollowed, A.B., Knowlton, N., Polovina, J., Rabalais, N.N., Sydeman W.J. and Talley, L.D.: Climate Change  
671 Impacts on Marine Ecosystems, In: C. A. Carlson and S. J. Giovannoni, (eds.) *Annual Review of Marine*  
672 *Science*, 10.1146/annurev-marine-041911-111611, 2012.  
673

674 Field, C.B., Behrenfeld, M.J., Randerson, J.T. and Falkowski, P.: Primary production of the biosphere:  
675 Integrating terrestrial and oceanic components. *Science*, 10.1126/science.281.5374.237, 1998.  
676

677 Hugenholtz, P.: Exploring prokaryotic diversity in the genomic era. *Genome Biology*, 10.1186/gb-2002-3-2-  
678 reviews0003, 2002.  
679

680 Kiliyas, E., Wolf, C., Noethig, E.-M., Peeken, I. and Metfies, K.: Protist distribution in the Western Fram Strait in  
681 summer. *J. Phycol.*, 10.1111/jpy.12109, 2013.  
682

683 Kiliyas, E., Kattner, G., Wolf, C., Frickenhaus, S. and Metfies, K.: A molecular survey of protist diversity through  
684 the central Arctic Ocean. *Pol. Biol.*, 10.1007/s00300-014-1519-5, 2014a.  
685

686 Kiliyas, E.S., Noethig, E.-M., Wolf, C. and Metfies, K.: Picoeukaryote Plankton Composition off West  
687 Spitsbergen at the Entrance to the Arctic Ocean., *J. Euk. Microbiol.*, 10.1111/jeu.12134, 2014b.  
688

689 Kiliyas, E., Peeken, I. and Metfies, K.: Protist diversity in Arctic Sea Ice and Melt pond aggregates obtained by  
690 pyrosequencing - a short insight. *Pol. Res.*, dx.doi.org/10.3402/polar.v33.23466, 2014.  
691

692 Kiliyas, E.S., Wolf, C. and Metfies, K.: Characterizing variability in marine protist communities via ARISA  
693 fingerprints—a method evaluation. *Limnol. Oceanogr. Methods*, 74-80, 10.1002/lom3.10008, 2015.  
694

695 Kraberg, A.C., Rodriguez, N. and Salewski, C.R.: Historical phytoplankton data from Helgoland Roads: Can  
696 they be linked to modern time series data? *J. Sea Res.*, 10.1016/j.seares.2015.03.004, 2015.  
697

698 Leibold, M.A.: Resources and predators can affect the vertical distributions of zooplankton. *Limnol. Oceanogr.*,  
699 10.4319/lo.1990.35.4.0938, 1990.

**Formatiert:** Tabstopps: 5,29 cm,  
Links

700  
701 Mackas, D.L., Denman, K.L. and Abbott, M.R.: Plankton Patchiness-Biology in the physical vernacular. Bulletin  
702 of Marine Science **37**, 652-674, 1985. (no doi available)  
703  
704 McQuatters-Gollop, A., Edwards, M., Helaouet, P., Johns, D.G., Owens, N.J.P., Raitsos, D.E., Schroeder, D.,  
705 Skinner, J. and Stern, R.F.: The Continuous Plankton Recorder survey: How can long-term phytoplankton  
706 datasets contribute to the assessment of Good Environmental Status? Estuar. Coast. Mar. Sci.,  
707 10.1016/j.ecss.2015.05.010,2015.  
708  
709 Mellard, J.P., Yoshiyama, K., Litchman, E. and Klausmeier, C.A.: The vertical distribution of phytoplankton in  
710 stratified water columns. J. Theor. Biol., 10.1016/j.jtbi.2010.09.041.  
711  
712 Medlin, L., Elwood, H.J., Stickel, S. and Sogin, M.L.: The characterization of enzymatically amplified  
713 eukaryotic 16S-like rRNA coding regions. Gene, 10.1016/0378-1119(88)90066-2, 1988.  
714  
715 Metfies, K. and Medlin, L.K.: Refining cryptophyte identification with DNA-microarrays. J.Plankton  
716 Res.,10.1093/plankt/fbm080, 2007.  
717  
718 Metfies, K., Gescher, C., Frickenhaus, S., Niestroy, R., Wichels, A., Gerdts, G., Kniefelkamp, B., Wiltshire, K.  
719 and Medlin L.: Contribution of the class Cryptophyceae to phytoplankton structure in the German Bight. J.  
720 Phycol., 10.1111/j.1529-8817.2010.00902.x, 2010.  
721  
722 Metfies, K., von Appen, W.J., Kiliyas, E., Nicolaus, A. and Noethig, E.M.: Biogeography and photosynthetic  
723 biomass of arctic marine pico-eukaryotes during summer of the record sea ice minimum 2012. Plos One,  
724 10.1371/journal.pone.0148512,2016.  
725  
726 Nehring, S.: Establishment of thermophilic phytoplankton species in the North Sea: biological indicators of  
727 climatic changes? ICES J. Mar. Sci., 10.1006/jmsc.1998.0389,1998.  
728  
729 Petersen, W.: FerryBox systems: State-of-the-art in Europe and future development. J.Mar.  
730 Syst.,10.1016/j.jmarsys.2014.07.003,2014.  
731  
732 Quast, C., Priesse, E., Yilmaz, P., Gerken, J., Schweer, T., Yarza, P., Peplies, J. and Gloeckner, F.O.: The  
733 SILVA ribosomal RNA gene database project: improved data processing and web-based tools. Nucleic Acids  
734 Res., 10.1093/nar/gks1219,2013.  
735  
736 Soltwedel, T.: HAUSGARTEN: multidisciplinary investigations at a deep-sea, long-term observatory in the  
737 Arctic Ocean. Oceanography, dx.doi.org/10.5670/oceanog.2005.24, 2005.  
738  
739 Sunagawa, S., Coelho, L.P., Chaffron, S., Kultima, J.R., Labadie, K., Salazar, G., Djahanschiri, B., Zeller, G.,  
740 Mende D.R., Alberti, A., Cornejo-Castillo, F.M., Costea, P.I., Cruaud, C., d'Ovidio, F., Engelen, S., Ferrera, I.,

741 Gasol, J.M., Guidi, L., Hildebrand, F., Kokoszka, F., Lepoivre, C., Lima-Mendez, G., Poulain, J., Poulos, B.T.,  
 742 Royo-Llonch, M., Sarmento, H., Vieira-Silva, S., Dimier, C., Picheral, M., Searson, S., Kandels-Lewis, S.,  
 743 Bowler, C., de Vargas, C., Gorsky, G., Grimsley, N., Hingamp, P., Iudicone, D., Jaillon, O., Not, F., Ogata, H.,  
 744 Pesant, S., Speich, S., Stemmann, L., Sullivan, M.B., Weissenbach, J., Wincker, P., Karsenti, E., Raes, J.,  
 745 Acinas, S.G. and Bork, P.: Structure and function of the global ocean microbiome. *Science*,  
 746 10.1126/science.1261359, 2015.  
 747  
 748 Thiele, S., Wolf, C., Schulz, I.K., Assmy, P., Metfies, K. and Fuchs, B.M.: Stable Composition of the Nano- and  
 749 Picoplankton Community during the Ocean Iron Fertilization Experiment LOHAFEX. *Plos One*,  
 750 10.1371/journal.pone.0113244, 2014.  
 751  
 752 Toebe, K., Alpermann, T.J. Tillmann, U. Krock, B. Cembella, A. and John, U.: Molecular discrimination of  
 753 toxic and non-toxic *Alexandrium* species (Dinophyta) in natural phytoplankton assemblages from the Scottish  
 754 coast of the North Sea. *Eur. J. Phycol.*,  
 755 10.1080/09670262.2012.752870, 2013.  
 756  
 757 Turnbaugh, P.J., Hamady, M., Yatsunenko, T., Cantarel, B.L., Duncan, A., Ley, R.E., Sogin, M.L., Jones, W.J.,  
 758 Roe, B.A., Affourtit, J.P., Egholm, M., Henrissat, B., Heath, A.C., Knight, R., and Gordon J.I.: A core gut  
 759 microbiome in obese and lean twins. *Nature*, 10.1038/nature07540, 2009.  
 760  
 761 Ussler, W., Preston, C., Tavormina, P., Pargett, D., Jensen, S., Roman, B., Marin, R., Shah, S.R., Girguis, P.R.,  
 762 Birch, J.M., Orphan, V. and Scholin C.: Autonomous Application of Quantitative PCR in the Deep Sea: In Situ  
 763 Surveys of Aerobic Methanotrophs Using the Deep-Sea Environmental Sample Processor. *Environ. Sci. Tech.*,  
 764 10.1021/es4023199, 2013.  
 765  
 766 Wassmann, P., Ratkova, T. and Reigstad, M.: The contribution of single and colonial cells of *Phaeocystis*  
 767 *pouchetii* to spring and summer blooms in the north-eastern North Atlantic. *Harmful Algae*,  
 768 10.1016/j.hal.2004.12.009, 2005.  
 769  
 770 Wiltshire, K.H., Kraberg, A., Bartsch, I., Boersma, M., Franke, H.-D., Freund, J., Gebuehr, C., Gerdts, G.,  
 771 Stockmann, K. and Wichels, A.: Helgoland Roads, North Sea: 45 Years of Change. *Estuar.  
 772 Coasts*, 10.1007/s12237-009-9228-y, 2009.  
 773  
 774 Woese, C.R.: Bacterial Evolution. *Microbiol. Rev.*, 51:221-271, 1987. (no doi available)  
 775  
 776 Wolf, C., Frickenhaus, S., Kiliyas, E.S., Peeken, I. and Metfies, K.: Regional variability in eukaryotic protist  
 777 communities in the Amundsen Sea. *Ant. Sci.*, 10.1017/S0954102013000229, 2013.  
 778  
 779 Wolf, C., Frickenhaus, S., Kiliyas, E.S., Peeken, I. and Metfies, K.: Protist community composition in the Pacific  
 780 sector of the Southern Ocean during austral summer 2010. *Pol. Biol.*, 10.1007/s00300-013-1438-x, 2014b.  
 781

782 Wolf, C., Kiliyas, E.S. and Metfies, K.: Evaluating the potential of 18S rDNA clone libraries to complement  
783 pyrosequencing data of marine protists with near full-length sequence information. Mar. Biol. Res.,  
784 10.1080/17451000.2013.852685,2014a.

785

786 Wollschlaeger, J., Nicolaus, A., Wiltshire, K.H. and Metfies, K.: Assessment of North Sea phytoplankton via  
787 molecular sensing: a method evaluation. J. Plankton Res., 10.1093/plankt/fbu003, 2014.

788

789 Wollschlaeger, J., Wiltshire, K.H. Petersen, W. and Metfies, K., Analysis of phytoplankton distribution and  
790 community structure in the German Bight with respect to the different size classes. J. Sea Res.,  
791 10.1016/j.seares.2015.02.005, 2015.

792

793 Zhu, F., Massana, R., Not, F., Marie, D. and Vaulot, D. Mapping of picoeucaryotes in marine ecosystems with  
794 quantitative PCR of the 18S rRNA gene. FEMS Microbiol Ecol. 10.1016/j.protis.2012.11.006, 2005.

795

796 Zielinski, O., Busch, J. A., Cembella, A. D., Daly, K. L., Engelbrektsson, J., Hannides, A. K., and Schmidt, H.  
797 Detecting marine hazardous substances and organisms: sensors for pollutants, toxins, and pathogens, Ocean Sci., 5,  
798 329-349, doi:10.5194/os-5-329-2009, 2009.

**Formatiert:** Schriftart: 10 Pt., Englisch (USA)

**Formatiert:** Schriftart: 10 Pt.

**Formatiert:** Schriftart: 10 Pt., Englisch (USA)

**Formatiert:** Schriftart: 10 Pt.

**Formatiert:** Abstand Vor: 0 Pt., Nach: 0 Pt., Zeilenabstand: 1,5 Zeilen

**Formatiert:** Schriftart: 10 Pt., Englisch (USA)

**Formatiert:** Schriftart: 10 Pt.

**Formatiert:** Schriftart: 10 Pt., Englisch (USA)

**Formatiert:** Schriftart: Times New Roman, 10 Pt.

**Formatiert:** Schriftart: Times New Roman, 10 Pt.

**Formatiert:** Schriftart: 10 Pt., Englisch (USA)
